# Supplementary material for: Smaug membraneless organelles regulate mitochondrial function
Source: bioRxiv preprint, doi:10.1101/2020.07.31.223099, version 1 (2020-07-31)
Supplement: Supplemental Figure 1 [file 223099_file06.docx]

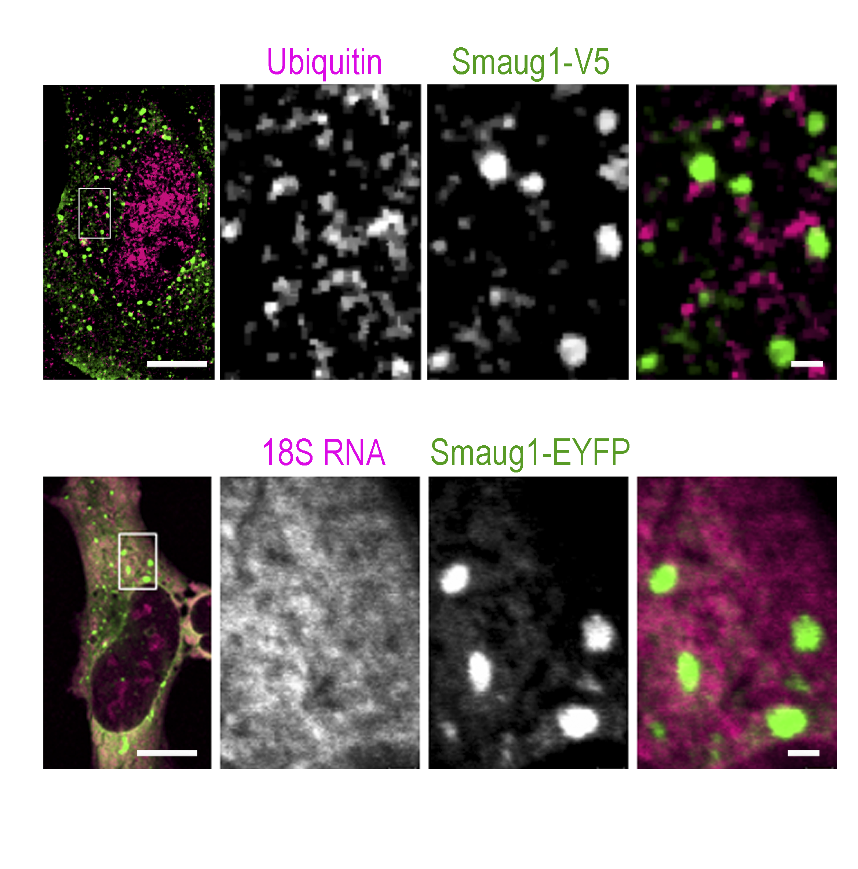


**Supplemental Figure 1. Smaug1-bodies exclude ubiquitin and small ribosomal subunits.**

Smaug1-V5-transfected U2OS cells were immunostained for V5 and ubiquitin. Smaug1-EYFP-transfected U2OS cells were submitted to FISH with a ribosomal 18S riboprobe as described in Material and Methods. Both markers are excluded from Smaug1-bodies
